# Supplementary material for: Factors influencing utilisation of services provided by community midwives and their non-retention in district Thatta, Pakistan: a qualitative study protocol
Source: HighWire-hosted journal article supplement (doi:10.1136/bmjopen-2021-052323), 2022-07-01
Supplement: bmjopen-2021-052323supp001_data_supplement.pdf [file bmjopen-2021-052323supp001_data_supplement.pdf]

**TELEPHONE SCRIPT- VERBAL INFORMED CONSENT:**

Study Title: Factors influencing Community Midwives utilization of services in district Thatta Pakistan

Asalam-o-Allaikum

I am Bakhtawar Khowaja, student MSc Health Policy and Management Programme, from department of Community Health Sciences, Aga Khan University. I am calling from The Aga Khan University regarding a study on factors influencing community midwives' utilization of services in District Thatta, Pakistan.

Do you have a few minutes to discuss the study?

- If yes, continue below.
- If no, but the potential subject is interested in participating, determine a better time to call back to discuss the study.
- If no, thank them for their time.

You have been invited to participate in this study because it will help explore us the factors that influence Community Midwives utilization of services. In this study we will ask several questions related to the research topic. This interview will last approximately 25-30 minutes and will be recorded through a voice recorder.

Being in this study is completely voluntary. Your decision whether to participate will not affect your current or future relationship with the researchers or anyone else at the Aga Khan University.

If you decide to take part in the study and then change your mind later, you are free to withdraw at any time.

Apart from giving your time, there are no risks or costs associated with taking part in this study.

There may be no direct benefit to you also. However, the results of this study will help to formulate policies and strategies to improve midwives' retention in rural areas and improve their performance in rural areas on Sindh.

Any information you provide will be stored securely and your identity/information will be kept strictly confidential, except as required by law. Nobody except principal investigator and the immediate research team will have an access to it. Study findings may be published, but you will not be individually identifiable in these publications. If you wish, we can share the study findings with you.

This study has been approved by The Aga Khan University Ethics Review Committee and will be conducted in accordance with the ethical principles.

Do you have any questions? Do you agree to participate in this study?

Yes:

No:

Name of Subject:

---

### Person Obtaining Consent

I have read this form to the subject. An explanation of the research was given and questions from the subject were solicited and answered to the subject's satisfaction. In my judgment, the subject has demonstrated comprehension of the information. The subject has provided oral consent to participate in this study.

Name and designation of Person obtaining Consent:

---

Signature of Person obtaining Consent:

---

Name and designation of Witness:

Signature of Witness

---

Date: \_\_\_\_\_
