# Supplementary material for: Factors influencing utilisation of services provided by community midwives and their non-retention in district Thatta, Pakistan: a qualitative study protocol
Source: HighWire-hosted journal article supplement (doi:10.1136/bmjopen-2021-052323), 2022-07-01
Supplement: bmjopen-2021-052323supp002_data_supplement.pdf [file bmjopen-2021-052323supp002_data_supplement.pdf]

### Key informant interview with District Health Officer

|                                                                                                                                                                                                                                         |
|-----------------------------------------------------------------------------------------------------------------------------------------------------------------------------------------------------------------------------------------|
| <b>General questions</b>                                                                                                                                                                                                                |
| 1. What are your views on availability of midwives in your district for provision of maternal and newborn care?<br><br><i>Probes: for deliveries, for antenatal care, birthing stations, community centers</i>                          |
| 2. In your opinion, what is the scope of midwifery profession?<br><br><i>Probes: views about scope, earning, respect and dignity</i>                                                                                                    |
| 3. What services are provided at primary facilities with maternal and newborn services and who provides the care?<br><br><i>Probes: deliveries, perinatal care, home visits, immunization, growth monitoring provided by CMWs, LHVs</i> |
| <b>CMWs skills competency</b>                                                                                                                                                                                                           |
| 4. Are midwives involved in the provision of services? And at what level of care?<br><br><i>Probes: deliveries, perinatal care, home visits, immunization, growth monitoring provided by CMWs, LHVs, levels of care</i>                 |
| 5. In your opinion, time required for training midwives is appropriate taking in consideration theory and practical knowledge?<br><br><i>Probes: theory knowledge and practicums, skills development</i>                                |
| 6. What are your views about midwives skills and knowledge to provide care to their communities?<br><br><i>Probes: knowledge, skills, competencies, confidence, mastery</i>                                                             |
| 7. What are your views regarding the quality of teaching in midwifery schools?<br><br><i>Probes: Teachers, number of schools available, clinical skills, support of hospitals for rotations</i>                                         |
| <b>Community acceptance and support</b>                                                                                                                                                                                                 |
| 8. Where do people go for maternal and newborn health services?<br><br><i>Probes: Obstetricians, LHVs, midwives, TBAs</i>                                                                                                               |
| 9. What are your views about community approach towards midwives for maternal and newborn services?<br><br><i>Probes: for deliveries, for antenatal care, birthing stations in community centers</i>                                    |

|                                                                                                                                                                                                                                                                                    |
|------------------------------------------------------------------------------------------------------------------------------------------------------------------------------------------------------------------------------------------------------------------------------------|
| <p>10. Do community midwives have adequate resources to provide care to community women?</p> <p><i>Probes: technical resources, equipment, supplies, fetoscope, measuring scales, vital signs monitoring</i></p>                                                                   |
| <p><b>Supportive supervision</b></p>                                                                                                                                                                                                                                               |
| <p>11. What are the factors that facilitate midwifery services in the district? Does your office . provide any support to midwives to practice in the district?</p> <p><i>Probes: Cultural context, social context, transport, language</i></p>                                    |
| <p>12. In your view what are important barriers to maternal and newborn health services in the district?</p> <p><i>Probes: lack of information, inadequate staffing, sociocultural barriers, cultural context, social context, transport, language</i></p>                         |
| <p>13. What is the process of training and deployment of midwives in the district? Does your office have any role in deploying CMWS after the training is completed?</p> <p><i>Probes: how midwives are trained, who deploy, how many leaders are involved in the process?</i></p> |
| <p>14. What support is provided to midwives from government sector?</p> <p><i>Probes: supervision, training, deployment</i></p>                                                                                                                                                    |
| <p>15. What is the role of MNCH programme and how are you connected to it?</p> <p><i>Probes: connection of MNCH programme, connection with midwives</i></p>                                                                                                                        |
| <p><b>Linkages between CMWs and facilities</b></p>                                                                                                                                                                                                                                 |
| <p>16. Which secondary health facilities are available in the district for referral services from primary facilities?</p> <p><i>Probes: number of health facilities, their distance from referral points, geographical location</i></p>                                            |
| <p>17. What maternal and newborn services are available in secondary health facilities?</p> <p><i>Probes: obstetricians, delivery services, theaters, newborn nursery</i></p>                                                                                                      |
| <p>18. Which secondary facility is approached mostly for referral services and why?</p> <p><i>Probes: relation of obstetricians or nurses with CMWs, facility with maximum services, location and transport availability</i></p>                                                   |
| <p>19. What is the process for referral from community clinics to secondary facilities? Do you see any role of CMWs in these facilities?</p> <p><i>Probes: transport, documentation, telephonic calls, where and how to refer which type of cases</i></p>                          |
| <p><b>Dynamics between CMWs and other health care providers</b></p>                                                                                                                                                                                                                |

|                                                                                                                                                                                                                                                                                                   |
|---------------------------------------------------------------------------------------------------------------------------------------------------------------------------------------------------------------------------------------------------------------------------------------------------|
| <p>20. What are your views about relation of midwives with other health care providers available in the district?</p> <p><i>Probes: relation with LHVs, relation with secondary health facilities for referrals, relation with doctors, relation with TBAs</i></p>                                |
| <p>21. What are your views about linking midwives with other health care providers available in the district? Are there any steps taken from the government side?</p> <p><i>Probes: standard charges assigned for services to all CMWs, different charges according to individual patient</i></p> |
| <p>22. What are your views regarding HCPs trust on midwives for provision of services?</p> <p><i>Probes: positive feedback from obstetricians, negative views</i></p>                                                                                                                             |
| <p><b>Affordability of CMWs services</b></p>                                                                                                                                                                                                                                                      |
| <p>23. Are there any guidelines available for CMWs to charge for their services?</p> <p><i>Probes: delivery charges, antenatal charges, referral charges, counseling charges</i></p>                                                                                                              |
| <p>24. What is the payment method followed for CMWs services? Or what would you recommend as a reasonable amount which could be affordable by poor and rural populations?</p> <p><i>Probes: income from services, fixed salary, government stipend</i></p>                                        |
| <p>25. In your opinion what mechanism of service charges should be applied to CMWs services?</p> <p><i>Probes: salary, patient ratio, stipend</i></p>                                                                                                                                             |
| <p>26. What and how investment is provided to CMWs to setup their clinics in community?</p> <p><i>Probes: by government stakeholders, self-investment</i></p>                                                                                                                                     |

### Key informant interview with Principal, School of midwifery

|                                                                                                                                                                                                                              |
|------------------------------------------------------------------------------------------------------------------------------------------------------------------------------------------------------------------------------|
| <b>General questions</b>                                                                                                                                                                                                     |
| 1. What are your views about significance of midwives for provision of maternal and newborn services?<br><br><i>Probes: views about scope, earning, respect and dignity</i>                                                  |
| 2. In your opinion, midwives are easily available in your district for maternal and newborn services?<br><br><i>Probes: for deliveries, for antenatal care, birthing stations in community centers</i>                       |
| <b>CMWs skills competency</b>                                                                                                                                                                                                |
| 3. What courses are covered in midwifery education?<br><br><i>Probes: practical and theory work, courses and curriculum</i>                                                                                                  |
| 4. What is the educational background of students who enroll in this programme?<br><br><i>Probes: science group, arts group, matriculation, intermediate</i>                                                                 |
| 5. Where and how midwives are trained for clinical practice? Are these opportunities sufficient to start independent practice?<br><br><i>Probes: supervised deliveries, newborn assessments, antenatal checkups</i>          |
| 6. In your opinion, the time required for training midwives is appropriate to take in consideration theory and practical knowledge?<br><br><i>Probes: theory knowledge and practicums, skills development</i>                |
| 7. What is the educational background of midwifery teachers?<br><br><i>Probes: midwives, nurses, geographical location, practical work</i>                                                                                   |
| 8. What assessment criterion is followed to provide certification?<br><br><i>Probes: theory exams, clinical exams, grading criteria</i>                                                                                      |
| 9. What measures are followed for students who do not successfully pass their exams?<br><br><i>Probes: re-sit exams, repetition of annual term</i>                                                                           |
| 10. Do you have any appreciation reward for high scoring students? If yes, what is it?<br><br><i>Probes: financial rewards, certificates, material rewards, jobs allotment</i>                                               |
| <b>Community acceptance and support</b>                                                                                                                                                                                      |
| 11. What type of exposure is provided to students of community clinics and community midwives' during their training?<br><br><i>Probes: duration, home visits, exposure of services of CMWs, hand-on practice in clinics</i> |

|                                                                                                                                                                                                                                                                                  |
|----------------------------------------------------------------------------------------------------------------------------------------------------------------------------------------------------------------------------------------------------------------------------------|
| <p>12. What practical skills are performed by students under supervision and independently during their training?</p> <p><i>Probes: deliveries in hospitals/ community, newborn assessments, antenatal services, home visits</i></p>                                             |
| <p>13. Does the school provide any technical support or resources to students during their visits or rotation as part of their training?</p> <p><i>Probes: technical resources, equipment, supplies, monitoring</i></p>                                                          |
| <p><b>Supportive supervision</b></p>                                                                                                                                                                                                                                             |
| <p>14. What is the admission criteria and process of enrollment for midwifery certification?</p> <p><i>Probes: admissions, qualification, enrollment forms, quota system, admission test</i></p>                                                                                 |
| <p>15. What is the involvement of stakeholders in training of midwives and who do you report?</p> <p><i>Probes: reporting to stakeholders at district level and national level</i></p>                                                                                           |
| <p>16. What is the fee structure for midwifery certification?</p> <p><i>Probes: fee charged, semesters and term system, annual system</i></p>                                                                                                                                    |
| <p><b>Linkages between CMWs and facilities</b></p>                                                                                                                                                                                                                               |
| <p>17. What exposure of facilities is provided to students?</p> <p><i>Probes: hospitals, maternity centers, BHUs and RHCs</i></p>                                                                                                                                                |
| <p>18. Do you teach students about referral services? If yes, what do you teach?</p> <p><i>Probes: high risk cases, process of referral, who to refer, which facility to refer, importance of referral services, building referral linkages</i></p>                              |
| <p><b>Dynamics between CMWs and other health care providers</b></p>                                                                                                                                                                                                              |
| <p>19. How will you describe your relation with other health care providers available in the district for training of students?</p> <p><i>Probes: relation with LHVs, relation with secondary health facilities for referrals, relation with doctors, relation with TBAs</i></p> |
| <p><b>Affordability of CMWs services</b></p>                                                                                                                                                                                                                                     |
| <p>20. What are your views about community to afford CMWs services?</p> <p><i>Probes: awareness, education level, charges and quality of services</i></p>                                                                                                                        |

### Key informant interview with President, Midwifery Association of Pakistan

|                                                                                                                                                                                                                                                                         |
|-------------------------------------------------------------------------------------------------------------------------------------------------------------------------------------------------------------------------------------------------------------------------|
| <b>Supportive supervision</b>                                                                                                                                                                                                                                           |
| 1. What are the major health issues related to maternal and newborn health in Pakistan?<br><i>Probes: maternal and newborn mortality, access to antenatal and delivery services, postpartum complication, complication related to abortions and deliveries</i>          |
| 2. What is the objective of Midwifery Association of Pakistan?<br><i>Probes: career development, trainings, quality of curriculum</i>                                                                                                                                   |
| 3. What support Pakistan Nursing Council and Government provide to midwives in trainings, deployment, building linkages with communities, other health care providers, for referrals?<br><i>Probes: financial incentives, trainings, curriculum, career development</i> |
| 4. In your opinion, what motivates midwives to choose midwifery as their profession?<br><i>Probes: money, interaction with women as their clients, social and cultural preferences</i>                                                                                  |
| 5. What are the challenges to midwives for delivery of services?<br><i>Probes: finance, community support, social and cultural barriers, respect of job, dignity of profession</i>                                                                                      |
| 6. What are your views about availability of midwives in rural areas of Pakistan?<br><i>Probes: for maternal and newborn care, antenatal and delivery services, postpartum care</i>                                                                                     |
| 7. What is the scope of midwifery profession in Pakistan?<br><i>Probes: views about scope, earning, respect and dignity</i>                                                                                                                                             |
| <b>CMWs skills competency</b>                                                                                                                                                                                                                                           |
| 8. What is the importance of CMWs in provision of maternal and newborn services?<br><i>Probes: maternal and newborn services, easy community access, home visits</i>                                                                                                    |
| 9. Are midwives involved in the provision of maternal and newborn services? And at what level of care?<br><i>Probes: deliveries, perinatal care, home visits, immunization, growth monitoring provided by CMWs, LHVs, levels of care</i>                                |
| 10. What are your views about availability of midwives in rural areas of Pakistan?<br><i>Probes: for maternal and newborn care, antenatal and delivery services, postpartum care</i>                                                                                    |
| 11. What is the quality of pre-service training of midwives?<br><i>Probes: hands-on clinical practice, clinical and public health knowledge</i>                                                                                                                         |
| 12. In your opinion, time required for training midwives is appropriate taking in consideration theory and practical knowledge?<br><i>Probes: theory knowledge and practicums, skills development</i>                                                                   |
| <b>Community acceptance and support</b>                                                                                                                                                                                                                                 |

|                                                                                                                                                                                                                                                                                                                                                                         |
|-------------------------------------------------------------------------------------------------------------------------------------------------------------------------------------------------------------------------------------------------------------------------------------------------------------------------------------------------------------------------|
| <p>13. What are your views about community women approach towards midwives for maternal and newborn services?</p> <p><i>Probes: for deliveries, for antenatal care, birthing stations in community centers</i></p>                                                                                                                                                      |
| <p>14. Do community midwives have adequate resources to provide care to community women?</p> <p><i>Probes: technical resources, equipment, supplies, fetoscope, measuring scales, vital signs monitoring</i></p>                                                                                                                                                        |
| <p><b>Affordability of CMWs services</b></p>                                                                                                                                                                                                                                                                                                                            |
| <p>15. What are your views about financial earnings of midwives?</p> <p><i>Probes: salary, financial incentives, fee for services</i></p>                                                                                                                                                                                                                               |
| <p>16. What do you think about community affordability for CMWs services?</p> <p><i>Probes: charge low, reasonable and affordable</i></p>                                                                                                                                                                                                                               |
| <p><b>Dynamics between CMWs and other health care providers</b></p>                                                                                                                                                                                                                                                                                                     |
| <p>17. What is your opinion about relation of midwives with other health care providers?</p> <p><i>Probes: relation with LHVs, relation with secondary health facilities for referrals, relation with doctors, relation with TBAs</i></p>                                                                                                                               |
| <p>18. What are your views about trust of HCPs on midwives services?</p> <p><i>Probes: relation with doctors, relation with TBAs and LHVs</i></p>                                                                                                                                                                                                                       |
| <p><b>Linkages between CMWs and facilities</b></p>                                                                                                                                                                                                                                                                                                                      |
| <p>19. In your opinion what is the significance of developing linkages between CMWs and health facilities?</p> <p><i>Probes: awareness, communication, processes, referral services, transport services, location of health facilities</i></p>                                                                                                                          |
| <p>20. What are your comments about linkages between CMWs with health facilities in Pakistan?</p> <p><i>Probes: associations with obstetricians, facilities, awareness about transport to health facility when referring patients, communication with health facilities about referring patient, discussing high risk patients with secondary health facilities</i></p> |

### Key informant interview with Director, Maternal and Child Health Program

|                                                                                                                                                                                                                                         |
|-----------------------------------------------------------------------------------------------------------------------------------------------------------------------------------------------------------------------------------------|
| <b>CMWs skills competency</b>                                                                                                                                                                                                           |
| 1. What services are provided at primary facilities with maternal and newborn services and who provides the care?<br><br><i>Probes: deliveries, perinatal care, home visits, immunization, growth monitoring provided by CMWs, LHVs</i> |
| 2. Are midwives involved in the provision of services? And at what level of care?<br><br><i>Probes: deliveries, perinatal care, home visits, immunization, growth monitoring provided by CMWs, LHVs, levels of care</i>                 |
| 3. What are your views about availability of midwives in rural areas of Pakistan?<br><br><i>Probes: for maternal and newborn care, antenatal and delivery services, postpartum care</i>                                                 |
| 4. What is the scope of midwifery profession in Pakistan?<br><br><i>Probes: views about scope, earning, respect and dignity</i>                                                                                                         |
| 5. In your opinion, time required for training midwives is appropriate taking in consideration theory and practical knowledge?<br><br><i>Probes: theory knowledge and practicums, skills development</i>                                |
| <b>Community acceptance and support</b>                                                                                                                                                                                                 |
| 6. Where do people go for maternal and newborn health services?<br><br><i>Probes: Obstetricians, LHVs, midwives, TBAs</i>                                                                                                               |
| 7. What are your views about community approach towards midwives for maternal and newborn services?<br><br><i>Probes: for deliveries, for antenatal care, birthing stations in community centers</i>                                    |
| 8. Do community midwives have adequate resources to provide care to community women?<br><br><i>Probes: technical resources, equipment, supplies, fetoscope, measuring scales, vital signs monitoring</i>                                |
| <b>Supportive supervision</b>                                                                                                                                                                                                           |
| 9. What are the factors that facilitate midwifery services in the district? Does your office provide any support to midwives to practice?<br><br><i>Probes: Cultural context, social context, transport, language</i>                   |
| 10. In your view what are important barriers to maternal and newborn health services?<br><br><i>Probes: lack of information, inadequate staffing, sociocultural barriers, cultural context, social context, transport, language</i>     |



|                                                                                                                                                                                                                                                                                                   |
|---------------------------------------------------------------------------------------------------------------------------------------------------------------------------------------------------------------------------------------------------------------------------------------------------|
| <p>11. What is the process of training and deployment of midwives? Does your office have any role in deploying CMWS after the training is completed?</p> <p><i>Probes: how midwives are trained, who deploy, how many leaders are involved in the process?</i></p>                                |
| <p>12. What support is provided to midwives from government sector?</p> <p><i>Probes: supervision, training, deployment</i></p>                                                                                                                                                                   |
| <p><b>Linkages between CMWs and facilities</b></p>                                                                                                                                                                                                                                                |
| <p>13. Which secondary health facilities are available in the district for referral services from primary facilities?</p> <p><i>Probes: number of health facilities, their distance from referral points, geographical location</i></p>                                                           |
| <p><b>Dynamics between CMWs and other health care providers</b></p>                                                                                                                                                                                                                               |
| <p>14. What are your views about relation of midwives with other health care providers available in the district?</p> <p><i>Probes: relation with LHVs, relation with secondary health facilities for referrals, relation with doctors, relation with TBAs</i></p>                                |
| <p>15. What are your views about linking midwives with other health care providers available in the district? Are there any steps taken from the government side?</p> <p><i>Probes: standard charges assigned for services to all CMWs, different charges according to individual patient</i></p> |
| <p><b>Affordability of CMWs services</b></p>                                                                                                                                                                                                                                                      |
| <p>16. Are there any guidelines available for CMWs to charge for their services?</p> <p><i>Probes: delivery charges, antenatal charges, referral charges, counseling charges</i></p>                                                                                                              |
| <p>17. What is the payment method followed for CMWs services? Or what would you recommend as a reasonable amount which could be affordable by poor and rural populations?</p> <p><i>Probes: income from services, fixed salary, government stipend</i></p>                                        |
| <p>18. In your opinion what mechanism of service charges should be applied to CMWs services?</p> <p><i>Probes: salary, patient ratio, stipend</i></p>                                                                                                                                             |
| <p>19. What and how investment is provided to CMWs to setup their clinics in community?</p> <p><i>Probes: by government stakeholders, self-investment</i></p>                                                                                                                                     |

**In depth Interviews with midwifery school students**

| Demographic data |                |  |
|------------------|----------------|--|
| 1.               | Age            |  |
| 2.               | Qualification  |  |
| 3.               | Marital status |  |

| General questions                                                                                                                                                                                 |
|---------------------------------------------------------------------------------------------------------------------------------------------------------------------------------------------------|
| 1. Why do you want to become a midwife?<br><i>Probes: self-choice, only option, parental pressure</i>                                                                                             |
| 2. What are your views about accessibility of community to CMWs for maternal and newborn services?<br><i>Probes: availability of midwives, birthing stations, community centers</i>               |
| 3. What are your views about significance of midwifery profession?<br><i>Probes: views about scope, earning, respect and dignity</i>                                                              |
| 4. What advice would you give to people considering midwifery as a career?<br><i>Probes: preferences about midwifery as a profession and why?</i>                                                 |
| CMWs skills competency                                                                                                                                                                            |
| 5. How do you find curriculum and training of your program?<br><i>Probes: clinical and practical work, theory knowledge, hands on practice, quality of teachers</i>                               |
| 6. What services can you provide after training?<br><i>Probes: knowledge about services of midwives</i>                                                                                           |
| 7. What opportunities are provided to you to experience midwifery skills?<br><i>Probes: competence to practice skills, confidence to perform deliveries, perinatal assessments</i>                |
| 8. What are your views about course plans and assessment criteria?<br><i>Probes: theory and practical together, assessments related to theory and practical work</i>                              |
| 9. Where will you work after your training is completed?<br><i>Probes: community centers, hospitals, maternity centers</i>                                                                        |
| 10. In your opinion, time required for your training is appropriate taking in consideration theory and practical knowledge?<br><i>Probes: theory knowledge and practicums, skills development</i> |
| Supportive supervision                                                                                                                                                                            |
| 11. How do you find support to practice clinical skills?<br><i>Probes: support of instructors, support of community, support of in-service midwives</i>                                           |

|                                                                                                                                                                                                                                                               |
|---------------------------------------------------------------------------------------------------------------------------------------------------------------------------------------------------------------------------------------------------------------|
| <p>12. In your opinion what are some reasons that lead midwives to discontinue their profession?<br/>What other jobs they are seeking for?</p> <p><i>Probes: social and cultural barriers, competence, money, community support, stakeholders support</i></p> |
| <p>13. What are facilitating factors for CMWs who have well-established setups in district communities?</p> <p><i>Probes: community trust, competency of skills, stakeholders support, money</i></p>                                                          |
| <p><b>Community acceptance and support</b></p>                                                                                                                                                                                                                |
| <p>14. What community clinics and community midwives' exposure is provided during your training?</p> <p><i>Probes: home visits, exposure of services of CMWs, hand-on practice in clinics</i></p>                                                             |
| <p>15. What skills you perform under supervision during your training and what are your views about it?</p> <p><i>Probes: deliveries in hospitals/ community, newborn assessments, antenatal services, home visits</i></p>                                    |
| <p>16. Do you think community midwives working in your areas have all the resources required to provide services?</p> <p><i>Probes: equipment, setup, support</i></p>                                                                                         |
| <p><b>Affordability of CMWs services</b></p>                                                                                                                                                                                                                  |
| <p>17. What are your views about financial earnings of midwives?</p> <p><i>Probes: salary, financial incentives, fee for services</i></p>                                                                                                                     |
| <p>18. In your opinion, the fee charged by CMWs can be afforded by every class group of communities?</p> <p><i>Probes: low-income, middle-income, high-income, different fees for different groups, charges for maternal and newborn services</i></p>         |
| <p><b>Dynamics between CMWs and other health care providers</b></p>                                                                                                                                                                                           |
| <p>19. What is your opinion about relation of community midwives with other health care providers?</p> <p><i>Probes: relation with LHVs, relation with secondary health facilities for referrals, relation with doctors, relation with TBAs</i></p>           |
| <p><b>Linkages between CMWs and facilities</b></p>                                                                                                                                                                                                            |

20. What type of exposure is provided to you during your training to practice your skills and learn about maternal and newborn services?

*Probes: hospitals, maternity centers, BHUs and RHCs*

21. Have you been taught about referral services?

*Probes: high risk cases, process of referral, who to refer, which facility to refer, importance of referral services*

**In depth Interviews– working group**

| <b>Demographic data</b> |                                 |  |
|-------------------------|---------------------------------|--|
| 1.                      | Age                             |  |
| 2.                      | Type of midwifery qualification |  |
| 3.                      | Highest education level         |  |
| 4.                      | Year of qualification           |  |
| 5.                      | Employment status               |  |
| 6.                      | Years of experience             |  |
| 7.                      | Marital status                  |  |

| <b>CMWs skills competency</b>                                                                                                                                                                                      |
|--------------------------------------------------------------------------------------------------------------------------------------------------------------------------------------------------------------------|
| 1. What is your current role in the facility?<br><i>Probes: services, teamwork, duties</i>                                                                                                                         |
| 2. How many midwives are available in your district for maternal and newborn services?<br><i>Probes: number of midwives, midwives working in centers, midwives at birthing stations</i>                            |
| 3. What is your opinion about your pre-service midwifery training for provision of maternal and newborn services?<br><i>Probes: knowledge about maternal and newborn services, competence of clinical practice</i> |
| 4. What services do you provide to community women without supervision?<br><i>Probes: counseling, education, deliveries, antenatal care, detection of high risk cases, newborn assessments, referral services</i>  |
| 5. In your opinion, time required for your training is appropriate taking in consideration theory and practical knowledge?<br><i>Probes: theory knowledge and practicums, skills development</i>                   |
| <b>Community acceptance and support</b>                                                                                                                                                                            |
| 6. What are your views about community women approach towards midwives for maternal and newborn services?<br><i>Probes: for antenatal care, postnatal care, delivery, neonatal care, immunization</i>              |
| 7. Do you have all the resources to provide services to community women?<br><i>Probes: technical resources, equipment, ambulances, referral services</i>                                                           |
| <b>Supportive supervision</b>                                                                                                                                                                                      |

|                                                                                                                                                                                                                                 |
|---------------------------------------------------------------------------------------------------------------------------------------------------------------------------------------------------------------------------------|
| 8. What support is provided by government to you?<br><i>Probes: supervision, follow-up of the services, finance, setup of clinics</i>                                                                                           |
| 9. For how long have you been working as CMWs?<br><i>Probes: money, community approach, support from government and private sector, respect</i>                                                                                 |
| 10. What are the challenges you have faced? What were the facilitator factors which helped you in continuing your work as CMW?<br><i>Probes: money, community approach, support from government and private sector, respect</i> |
| 11. Have you considered leaving your job? If so, why? What factors contributed to your decision to leave the job?<br><i>Probes: security, gender issues, personal issues, social and cultural issues</i>                        |
| 12. What advice would you give to people considering midwifery as a career?<br><i>Probes: preferences about midwifery as a profession and why?</i>                                                                              |
| 13. What are your views about midwives who are not performing their role for maternal and newborn services?<br><i>Probes: involved in other activities, social, cultural and workplace issues</i>                               |
| 14. What are your opinions about availability and accessibility of midwives for maternal and newborn services in your district?<br><i>Probes: role of midwives, midwives for maternal and newborn services</i>                  |
| <b>Dynamics between CMWs and other health care providers</b>                                                                                                                                                                    |
| 15. How do you see your working relationship with other healthcare providers?<br><i>Probes: LHVs, TBAs, obstetricians Probes: LHVs, TBAs, obstetricians</i>                                                                     |
| <b>Affordability for CMWs services</b>                                                                                                                                                                                          |
| 16. What are your remarks about your financial earnings?<br><i>Probes: salary, stipend, financial incentives, fee for services</i>                                                                                              |
| 17. What are your views about community affordability for services provided by you?<br><i>Probes: for deliveries, home visits, perinatal services</i>                                                                           |
| 18. What services are provided mostly by you and which class group people approach you?<br><i>Probes: low to high income class groups, for home visits, for deliveries, for counseling, for antenatal education</i>             |
| <b>Linkages between CMWs and facilities</b>                                                                                                                                                                                     |
| 19. What facilities are available for referral services near you and how do you communicate for referral process?                                                                                                               |

*Probes: facilities available maternal and newborn services, communication with facilities, transport available, health providers in the facilities*

20. What support is provided to you by facilities for referring patients?

*Probes: communication method, transport, money*

**In-depth Interviews - Non working group**

|                                                                                                                                                                                                                                     |
|-------------------------------------------------------------------------------------------------------------------------------------------------------------------------------------------------------------------------------------|
| <b>Supportive supervision</b>                                                                                                                                                                                                       |
| 1. What support is provided by government and stakeholders to midwives of your district?<br><i>Probes: supervision, follow-up of the services, finance, setup of clinics</i>                                                        |
| 2. What are your views about midwives who are currently working in your district?<br><i>Probes: earning, support, career growth</i>                                                                                                 |
| 3. What are the challenges to midwives for delivery of services?<br><i>Probes: finance, community support, social and cultural barriers, respect of job, dignity of profession</i>                                                  |
| 4. What support was provided to you when you were in your job?<br><i>Probes: finance, community support, support by stakeholders</i>                                                                                                |
| <b>Affordability for CMWs services</b>                                                                                                                                                                                              |
| 5. What are your views about financial earnings of midwives?<br><i>Probes: stipend, fee for services</i>                                                                                                                            |
| 6. How do you perceive community affordability for services provided by you?<br><i>Probes: for deliveries, home visits, perinatal services</i>                                                                                      |
| <b>Community acceptance and support</b>                                                                                                                                                                                             |
| 7. What are your views about community approach towards midwives for maternal and newborn care services?<br><i>Probes: for deliveries, for antenatal care, birthing stations in community centers</i>                               |
| 8. Do community midwives have all the resources to provide care to women?<br><i>Probes: for antenatal care, postnatal care, neonatal care, equipment, ambulances</i>                                                                |
| <b>Dynamics between CMWs and other health care providers</b>                                                                                                                                                                        |
| 9. What are your views about relation of midwives with other health care providers?<br><i>Probes: relation with LHVs, relation with secondary health facilities for referrals, relation with doctors, relation with TBAs</i>        |
| <b>Linkages between CMWs and facilities</b>                                                                                                                                                                                         |
| 10. What are your views about linkages of CMWs with health facilities?<br><i>Probes: facilities available maternal and newborn services, communication with facilities, transport available, health providers in the facilities</i> |
| <b>CMWs skills competency</b>                                                                                                                                                                                                       |
| 11. What is your opinion about your pre-service midwifery training for provision of maternal and newborn services?<br><i>Probes: knowledge about maternal and newborn services, competence of clinical practice</i>                 |



12. What was your role in hospital/community clinics?

*Probes: services and duties*

13. Why are you not continuing your midwifery practice?

*Probes: personal and family reasons, social and cultural reasons, security*

14. What are your future goals related to your professional life?

*Probes: studies, practice*

**IDI with community women**

| Demographic data |                             |
|------------------|-----------------------------|
| 1.               | Age                         |
| 2.               | Education                   |
| 3.               | Marital status              |
| 4.               | Number of children          |
| 5.               | Available nearby facilities |

| Community acceptance and support                                                                                                                                                                  |
|---------------------------------------------------------------------------------------------------------------------------------------------------------------------------------------------------|
| 1. Where do you go for perinatal services?<br><i>Probes: LHVs, CMWs, Obstetricians</i>                                                                                                            |
| 2. Which type of health facility did you visit for maternal health services during your most recent pregnancy?<br><i>Probes: Hospitals, midwives' clinics, antenatal home visits</i>              |
| 3. Do you have any information about midwives, who are they how are they different from TBAs, or doctors?                                                                                         |
| 4. Can you name any midwife of your area, how have you met her? Who told you about her?                                                                                                           |
| 5. What health services did you receive when you visited midwives and how was your experience?<br><i>Probes: antenatal services, delivery services</i>                                            |
| 6. What advice would you give to people for accessing midwives for maternal health services?<br><i>Probes: preferences about midwives</i>                                                         |
| 7. What are your views about the availability of supplies and equipment to CMWs to provide perinatal care and services?<br><i>Probes: for vital signs monitoring, fetoscope, measuring scales</i> |
| Affordability for CMWs services                                                                                                                                                                   |
| 8. What are your views about midwives' fees for perinatal services?<br><i>Probes: affordability, bribes for health services</i>                                                                   |
| Supportive supervision                                                                                                                                                                            |
| 9. What are your views about availability and accessibility of midwifery services?<br><i>Probes: transport, time, location</i>                                                                    |

|                                                                                                                                                                                                                                                |
|------------------------------------------------------------------------------------------------------------------------------------------------------------------------------------------------------------------------------------------------|
| <b>CMWs skills competency</b>                                                                                                                                                                                                                  |
| 10. What are your views about knowledge of midwives for maternal health?<br><i>Probes: knowledge about high risk pregnancies, complications, newborn care</i>                                                                                  |
| <b>Linkages between CMWs and facilities</b>                                                                                                                                                                                                    |
| 11. Have you ever been referred to any health facility by CMW? What was the reason and how was your experience?<br><i>Probes: health facility, transport, communication with health facility, reason for referral</i>                          |
| <b>Dynamics between CMWs and other health care providers</b>                                                                                                                                                                                   |
| 12. How do you find relation of your community midwife with other health care providers of your area?<br><i>Probes: relation with LHVs, relation with secondary health facilities for referrals, relation with doctors, relation with TBAs</i> |
